# Supplementary figures and images for: Nanoparticulate carbon black in cigarette smoke induces DNA cleavage and Th17-mediated emphysema
Source: eLife journal article supplement (doi:10.7554/elife.09623), 2015-10-05

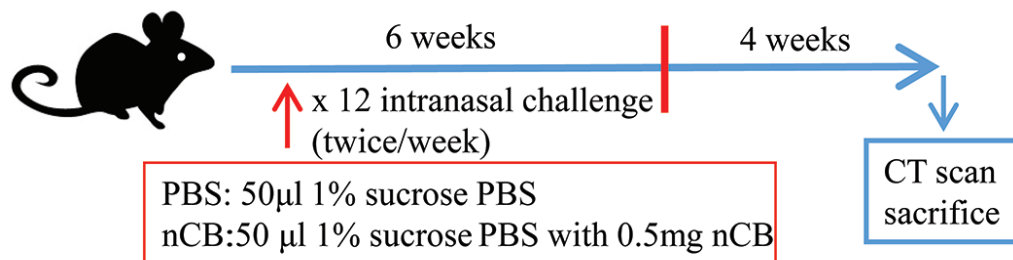

Supplement: supp [file elife_poa_e09623_Figure_2_figure_supplement_1.pdf › elife_poa_e09623_Figure_2_figure_supplement_1.pdf]

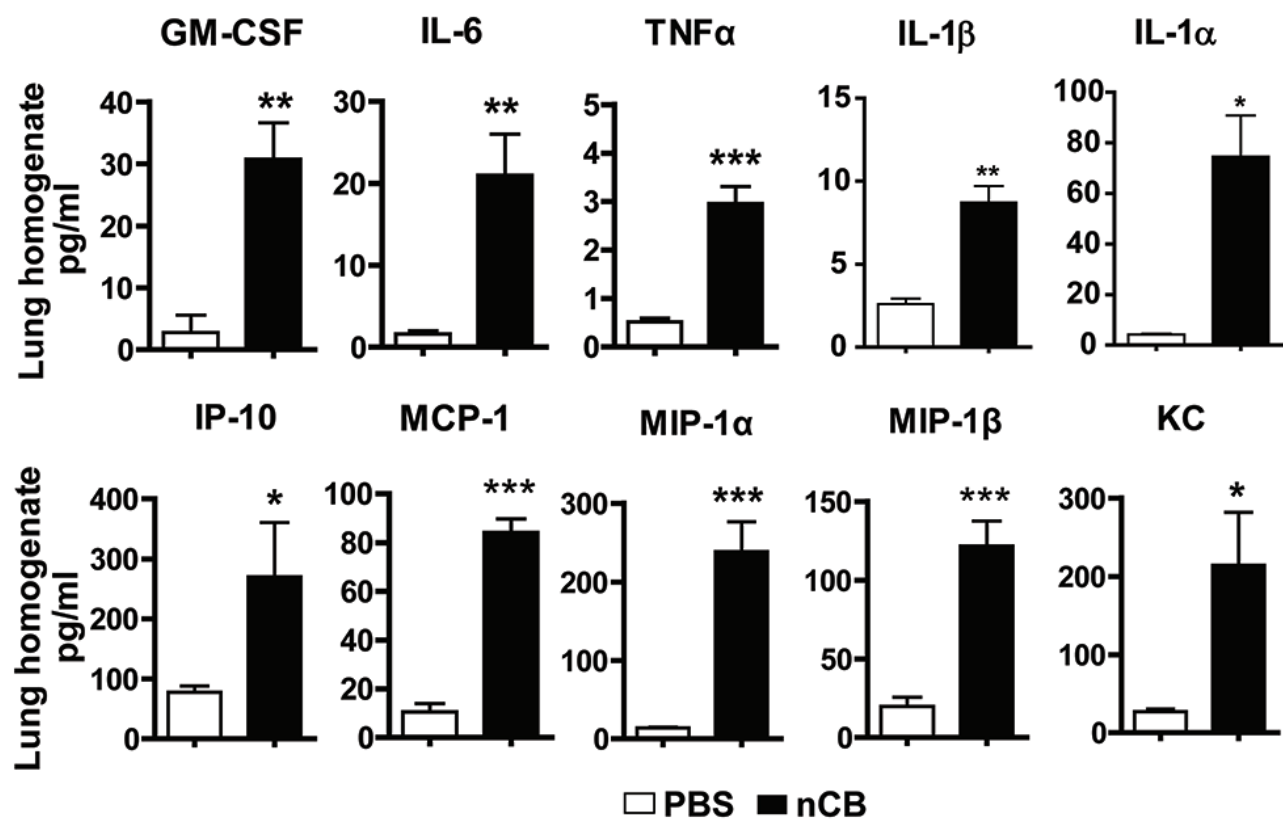

Supplement: supp [file elife_poa_e09623_Figure_2_figure_supplement_2.pdf › elife_poa_e09623_Figure_2_figure_supplement_2.pdf]

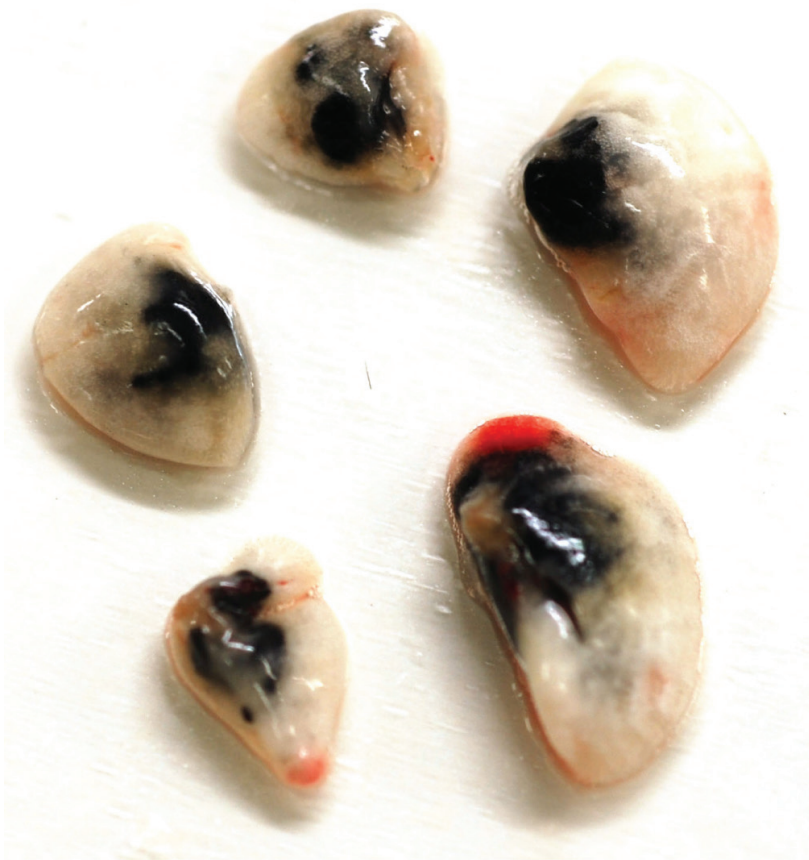

Supplement: supp [file elife_poa_e09623_Figure_2_figure_supplement_3.pdf › elife_poa_e09623_Figure_2_figure_supplement_3.pdf]

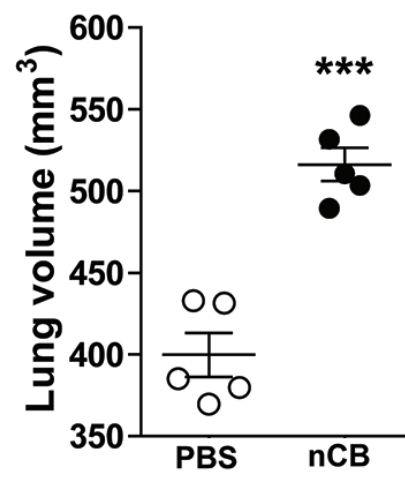

Supplement: supp [file elife_poa_e09623_Figure_2_figure_supplement_4.pdf › elife_poa_e09623_Figure_2_figure_supplement_4.pdf]

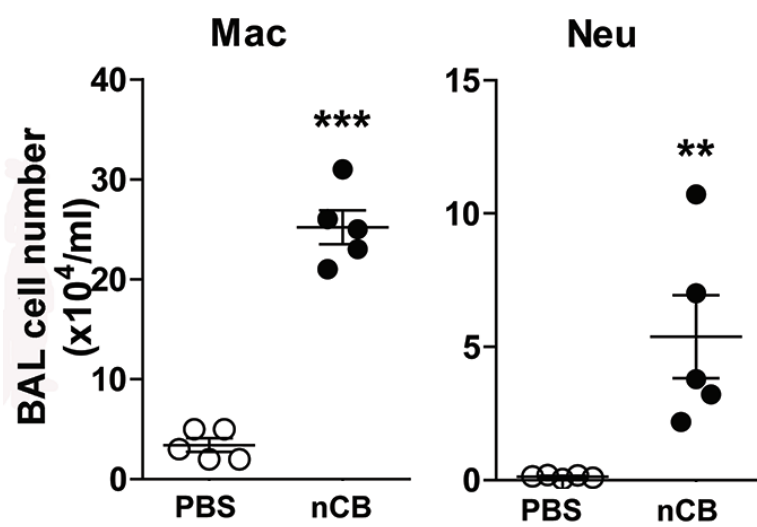

Supplement: supp [file elife_poa_e09623_Figure_2_figure_supplement_5.pdf › elife_poa_e09623_Figure_2_figure_supplement_5.pdf]

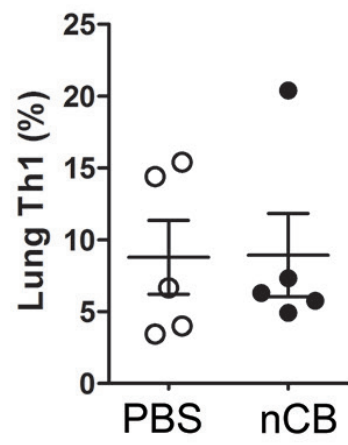

Supplement: supp [file elife_poa_e09623_Figure_3_figure_supplement_1.pdf › elife_poa_e09623_Figure_3_figure_supplement_1.pdf]

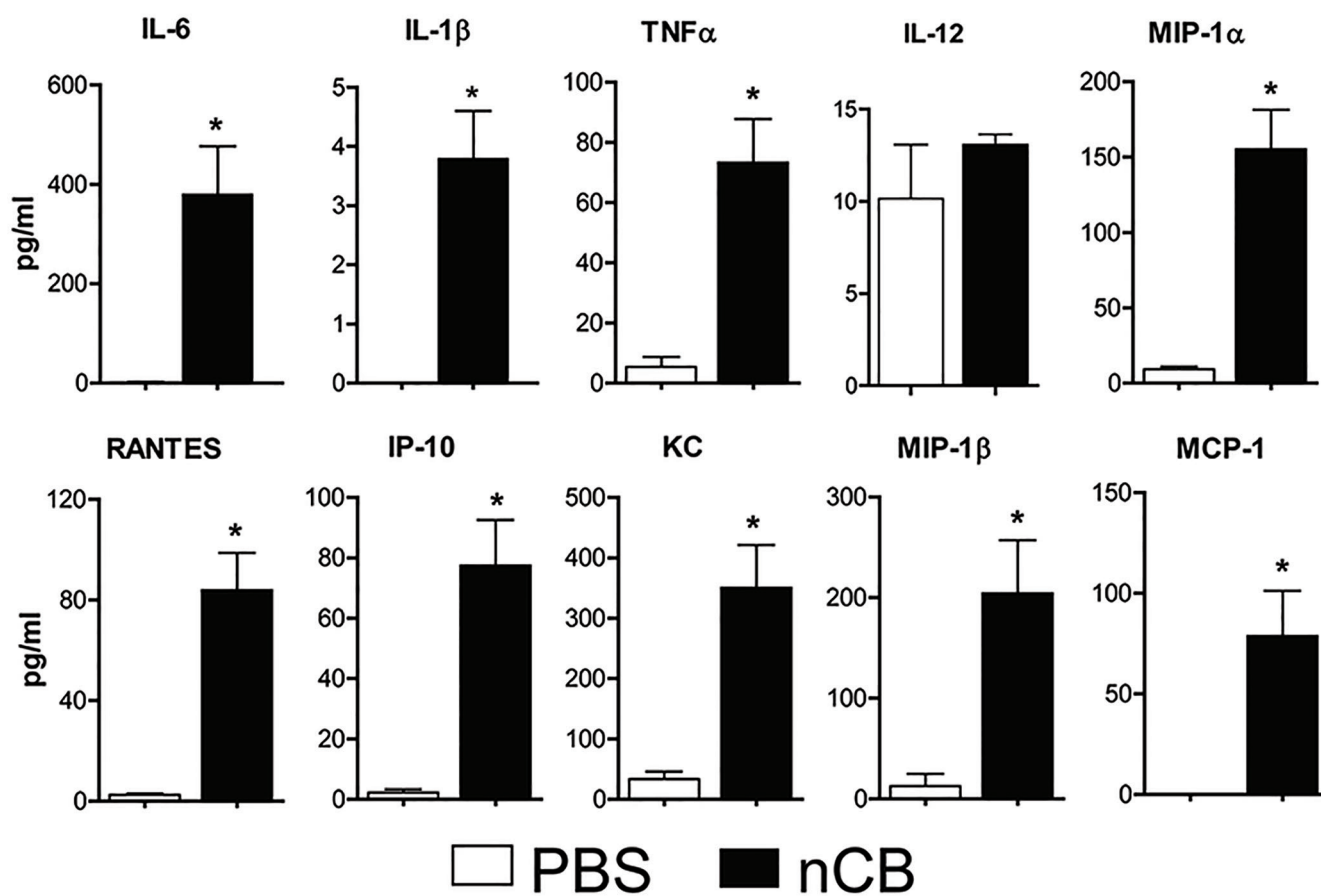

Supplement: supp [file elife_poa_e09623_Figure_3_figure_supplement_2.pdf › elife_poa_e09623_Figure_3_figure_supplement_2.pdf]

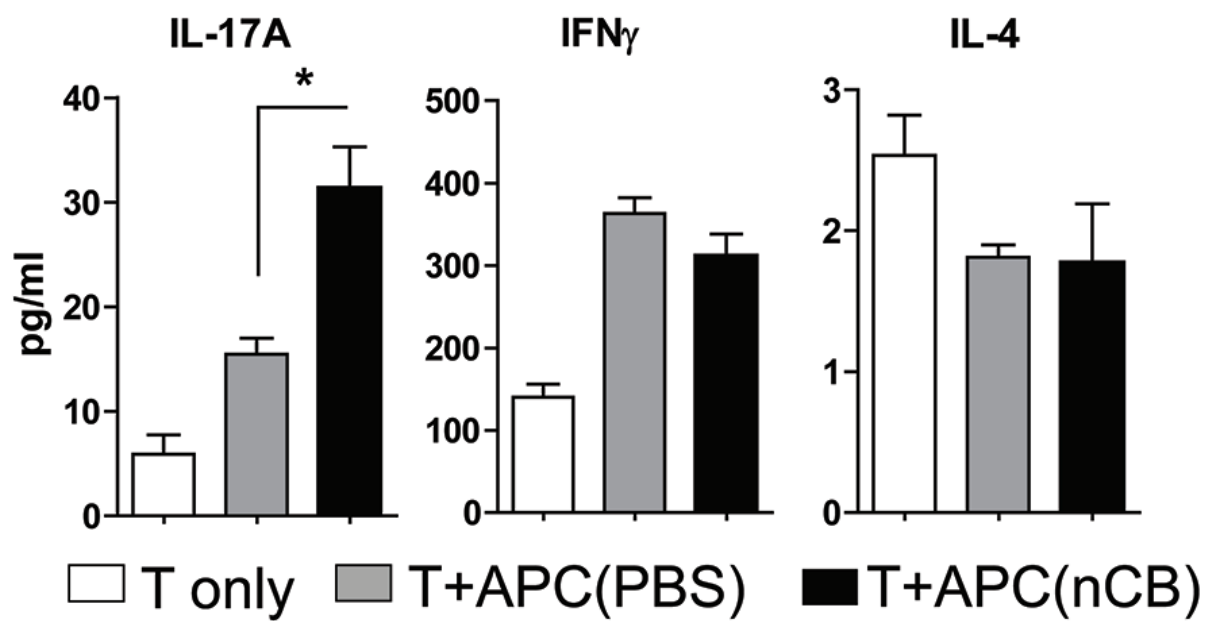

Supplement: supp [file elife_poa_e09623_Figure_3_figure_supplement_3.pdf › elife_poa_e09623_Figure_3_figure_supplement_3.pdf]

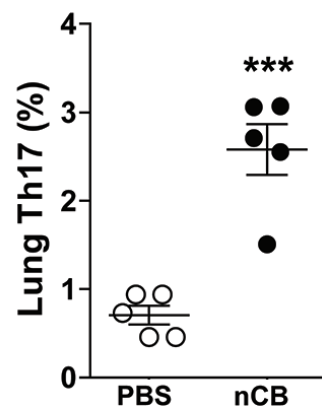

Supplement: supp [file elife_poa_e09623_Figure_3_figure_supplement_4.pdf › elife_poa_e09623_Figure_3_figure_supplement_4.pdf]

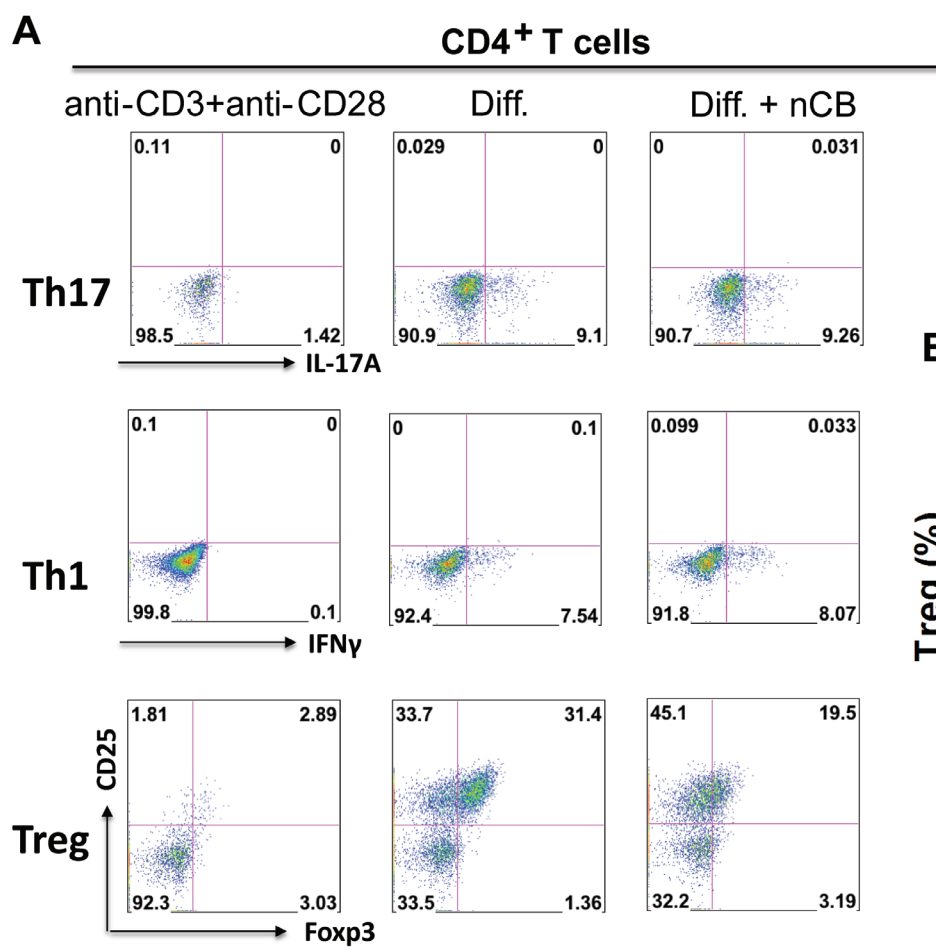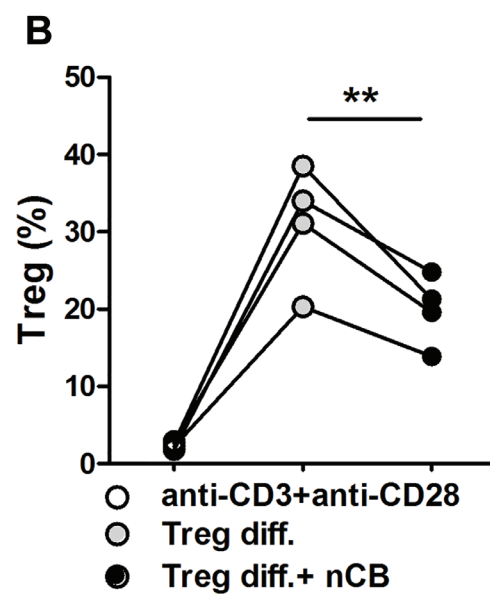

Supplement: supp [file elife_poa_e09623_Figure_3_figure_supplement_5.pdf › elife_poa_e09623_Figure_3_figure_supplement_5.pdf]

**PBS**

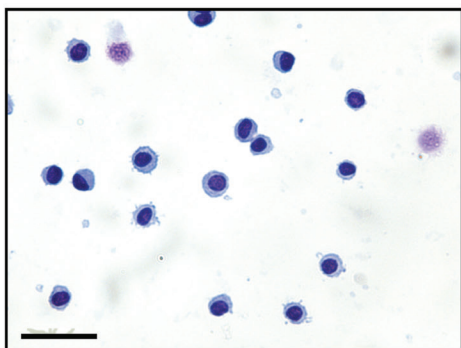

**nCB**

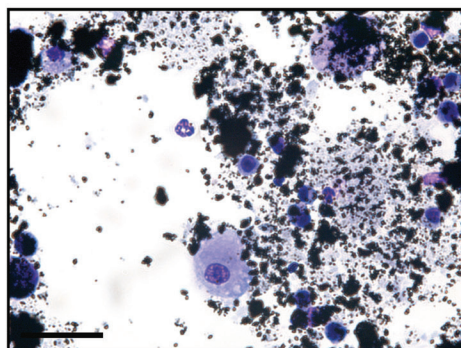

**PEG-nCB**

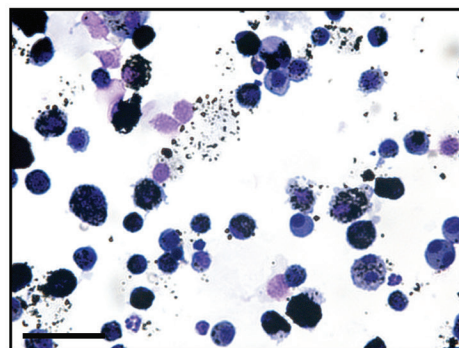

Supplement: supp [file elife_poa_e09623_Figure_4_figure_supplement_1.pdf › elife_poa_e09623_Figure_4_figure_supplement_1.pdf]

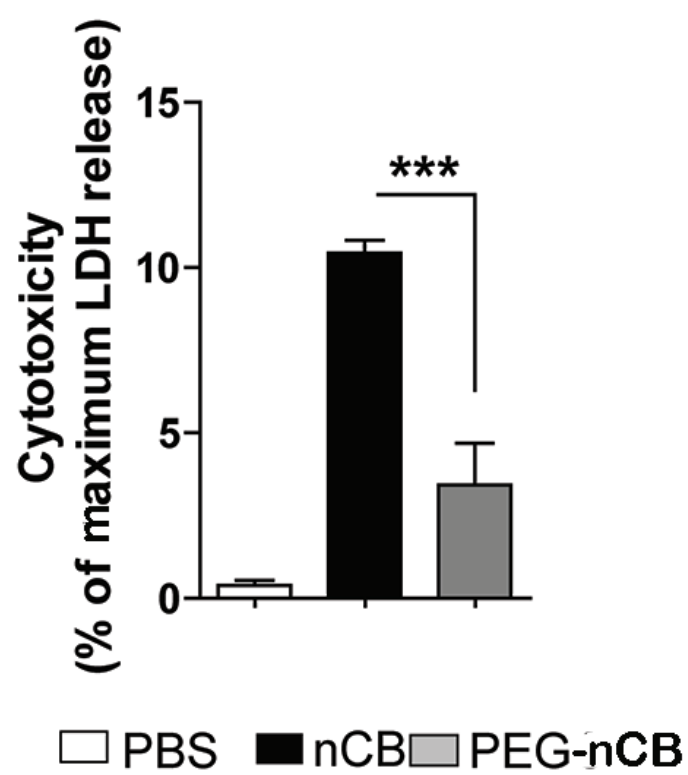

Supplement: supp [file elife_poa_e09623_Figure_4_figure_supplement_2.pdf › elife_poa_e09623_Figure_4_figure_supplement_2.pdf]

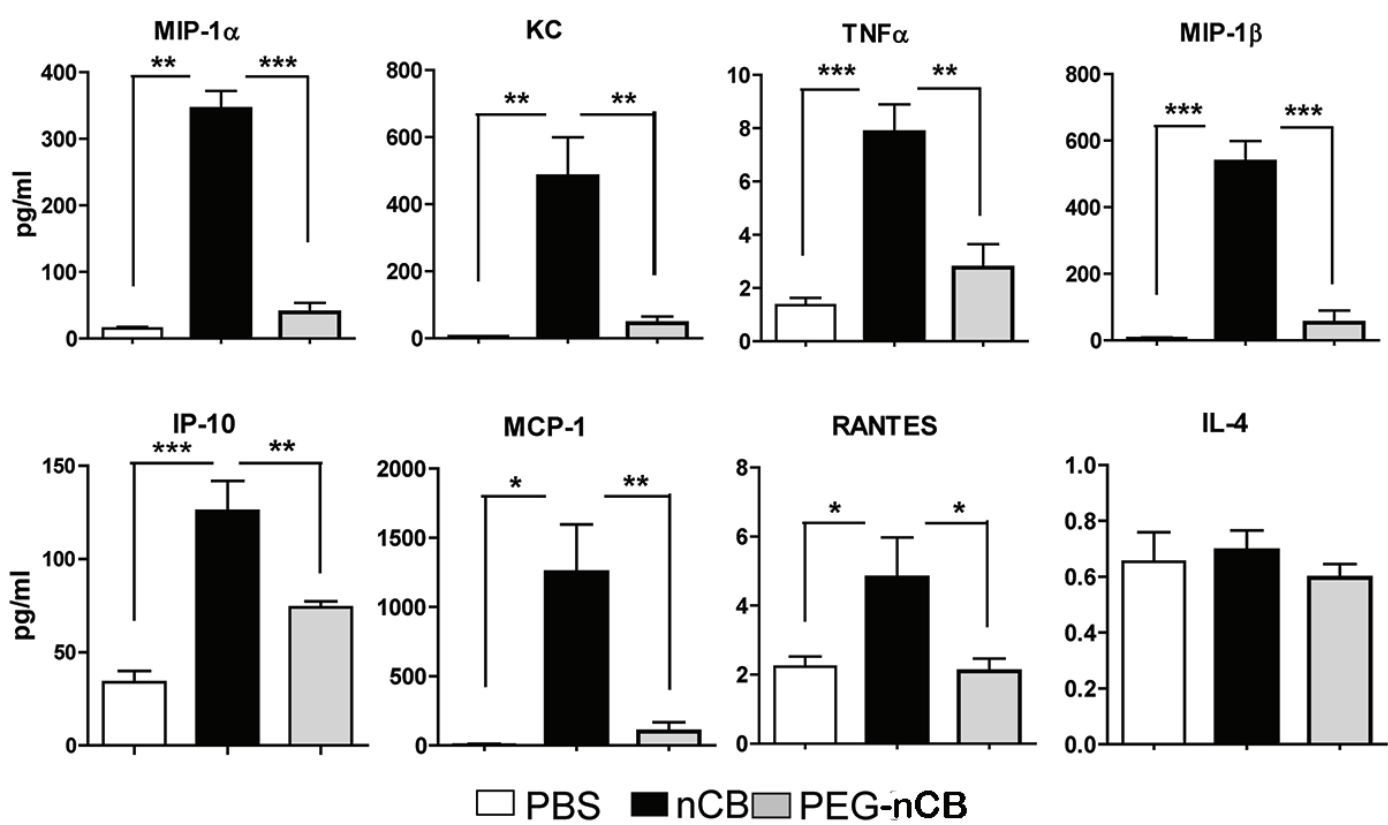

Supplement: supp [file elife_poa_e09623_Figure_4_figure_supplement_3.pdf › elife_poa_e09623_Figure_4_figure_supplement_3.pdf]

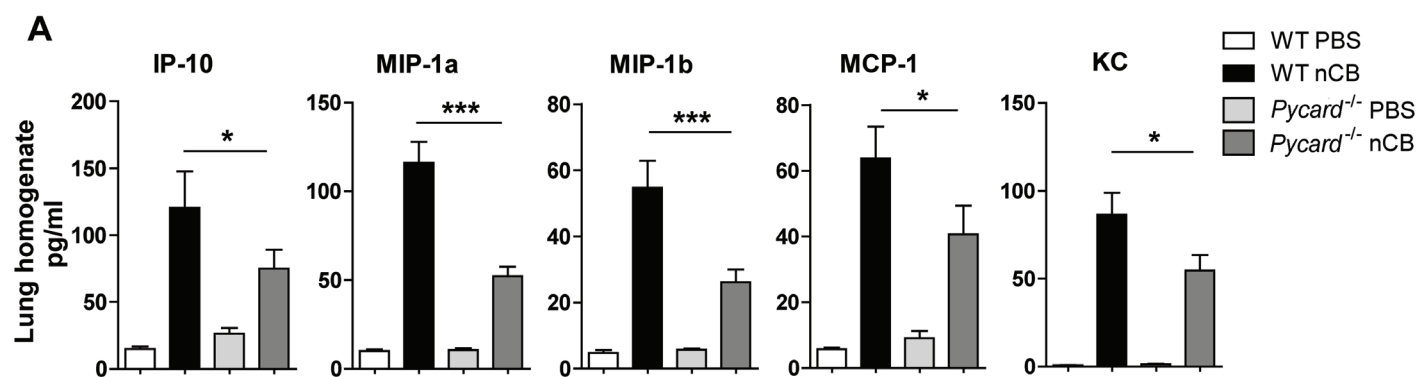

Supplement: supp [file elife_poa_e09623_Figure_6_figure_supplement_1.pdf › elife_poa_e09623_Figure_6_figure_supplement_1.pdf]
